# Supplementary material for: Harvesting for food versus feed: a review of Peruvian fisheries in a global context
Source: Springer Nature journal article supplement (doi:10.1007/s11160-013-9336-4), 2013-11-27
Supplement: MOESM3 [file 11160_2013_9336_MOESM3_ESM.doc]

**Online Resource 3: Supplementary figures**

Article title: Harvesting for food versus feed: A review of Peruvian fisheries in a global context

Journal : Reviews in Fish Biology and Fisheries

Authors:

Pierre Fréon, UMR 212 EME, IRD, CRHMT, Sète, France ([pierre.freon@ird.fr](mailto:pierre.freon@ird.fr)); Tél. : +33 4 99 57 32 02 ; Fax : +33 04 99 57 32 95

Juan Carlos Sueiro, Centro para la Sostenibilidad Ambiental, Universidad Peruana Cayetano Heredia, Lima, Peru

Federico Iriarte, I&A, Lima, Peru

Oscar F. Miro Evar, Universidad de Tumbes, Tumbes, Peru

Yuri Landa, Universidad de Lima, Lima, Peru

Jean-François Mittaine, Fishmeal Experts Office, Ville-d'Avray, France

Marilu Bouchon, IMARPE, Callao, Peru

**Statistical analyses on monthly time series of crude oil and FMFO prices and effects on production costs.**

Statistical analyses were performed between monthly time series for prices of crude oil (Cushing, OK WTI Spot Price FOB) and the prices of the other two fishery-based commodities for the period 1994 to 2010. For the latter, European prices[[1]](#footnote-2) were used as a proxy for the global market. Stationarity was obtained (all p values <0.05) after first differentiating the three full series with lag one. Here and for all subsequent analyses presented below, no structured non-linear relationships were detected between the differentiated series using General Additive Models (GAMs). The correlations between the differentiated series of fishmeal or fish oil prices versus crude oil prices are significant but extremely low (corrected r²=0.03 and 0.13, respectively; both with p<0.01); the residuals are autocorrelated in both cases (Durbin-Watson test; p<0.01) and their distributions strongly differ from normality in both cases (Jarque Bera Test; p<0.001).

Despite some large amplitude interannual variations during the financial crisis of the late-2000s, there is a clear positive trend (slope=1.13; p<0.001) in the crude oil price index since 1999. This trend is close to the trends for fishmeal (slope=1.04; p<0.001) and fish oil (slope=0.94; p<0.001) prices indices during the same period (Online Resource 1; Fig. S6). In any case, the causal relationship between these prices is not obvious. The major commodity price indices, excluding energy, follow positive trends similar to fish products (Online Resource 1; Fig. S7). This suggests that all of these commodities are related to the performance of the global economy (Sieczka and Holyst 2009), although the ramping up of fish products occurred earlier (1999) than for other commodities (2004). Nonetheless, a large increase in the price of crude oil should influence the prices of all fish products, as fishing and transformation processes are highly energy demanding. Let us focus here on canned anchovy, the dominant anchovy food product.

Diesel fuel consumption during fishing operations is usually high, varying from 21 to 140 l per t of landed pelagic fish (Arnason 2007; Parker and Tyedmers 2011). Nonetheless, due to the overall high density of the anchovy exploited in Peru, fuel costs for extraction are lower than in other fisheries (approximately 23 l per t in Peru; Avadi and Fréon 2013). By reprocessing data from Paredes and Gutierrez (2008), one can estimate the semi-variable costs[[2]](#footnote-3) of production of the industrial Peruvian anchovy fishery, in which diesel fuel and lubricating oil accounted for more than 97%. From 2000 to 2007, these semi-variable costs amounted to 20% (16 to 29%) of total costs on average when capital costs were excluded and 14% (11 to 21%) when a cost of capital equal to 10% of its value was included (but without equipment depreciation in both cases).

Regarding canning itself, the share of energy in direct costs of production is also limited, with an estimate of <13%. All together, these values of fuel contributions to fishing and canning demonstrate the moderate impact that crude oil price variations may have on food anchovy products.

**Statistical analyses on yearly time series of FMFO prices versus raw fish production**

*Regional scale:*

Peruvian FMFO FOB time series of prices were contrasted with catches of Peruvian and Chilean fish mostly aimed at reduction to FMFO (as shown in Fig. 4) from 1994 to 2010. The first differentiated series of fishmeal prices versus regional catches[[3]](#footnote-4) display a linear negative and significant relationship (corrected r²=0.29; p<0.05) with normally distributed residuals (Jarque Bera Test; p>0.05) and without autocorrelation (Durbin-Watson; p>0.05), whereas the same relationship with fish oil instead of fishmeal prices proved to be not significant (corrected r²=0.05; p>0.05).

*Global scale:*

Because fishmeal and fish oil are global commodities, we also analyzed the relationships between FMFO FOB time series of European market prices (source FAO) and global catches aimed at reduction to FMFO as available indicated in Fig. 6. The results were similar to those reported previously. The first differentiated series of fishmeal prices versus world catches display a linear negative and significant relationship (corrected r²=0.19; p=0.05) with normally distributed residuals (Jarque Bera Test; p>0.05) and without autocorrelation (Durbin-Watson; p>0.05), whereas the same relationship with fish oil instead of fishmeal prices also proved to be not significant (corrected r²=0.04; p>0.05).

The negative relationship between fishmeal prices and raw material suggests that in a situation of high demand for fishmeal, a scarcity of raw material partly drives the price of this commodity.

**Statistical analyses on yearly time series of FMFO prices versus FMFO production**

*Regional scale:*

Peruvian FMFO FOB time series of prices were contrasted with both the national and world production of FMFO from 1995 to 2012. In both cases, the first differentiated series of fishmeal prices versus production displays a linear negative and significant relationship (corrected r²=0.39 and 0.40, respectively; p<0.005 in both cases) with normally distributed residuals (Jarque Bera Test; p>0.05) and without autocorrelation (Durbin-Watson; p>0.05) in both cases. In contrast, the same relationships with fish oil instead of fishmeal prices proved to be non-significant (corrected r²=0.06 and 0.01; p>0.05). The first result can be interpreted as a supply curve shifting: fishmeal supply decreased since 1994, whereas the demand, although difficult to quantify, obviously increased at least until ~2005 (Tacon et al., 2011). As a result, the price of the commodity increases.

*Global scale:*

FMFO FOB time series of global average prices (source: FAO) were contrasted with FMFO world production from 1995 to 2011. The first differentiated series of fishmeal prices versus global production display a linear negative and significant relationship (corrected r²=0.33; p<0.005) with normally distributed residuals (Jarque Bera Test; p>0.05) and without autocorrelation (Durbin-Watson; p>0.05), whereas the same relationship with fish oil instead of fishmeal prices proved to be not significant (corrected r²=0.01; p>0.05).

**Statistical analyses on time series of FMO prices versus prices of FMFO substitutes**

The market conditions described in Section 4.1 have recently provided the aquaculture sector with incentives to use more alternative sources of proteins and fatty acids for aquafeeds, as occurred earlier for pigs and poultry (Hardy, 2010; Turchini et al., 2011; Tacon et al., 2011; Asche et al., 2013). This has contributed to a leveling off demand pressure on FMFO. As a result, demand for FMFO also depends on the price ratios relative to substitute feed ingredients. In terms of volume, the global supply of agricultural based meals and oils far exceeds that of marine meals and oils and, therefore, will have a much stronger influence on the price of FMFO than vice versa. Historically, soybean meal prices have tended to determine the prices of fishmeal (Asche and Tveteras 2004). However, this price relationship has weakened during the last 15 years (Fig. 4) with the entry of the aquaculture sector as the largest buyer of fishmeal (Kristofferson and Anderson, 2006). As a result, the relationship between the differentiated time series of the two commodities is no longer significant due to the presence of two price regimes, according to Asche et al. (2013). In the case of fish oil, the price of rapeseed oil (canola) is a common reference because the latter is a common substitute for the former in animal feeds, along with soybean oil (Tacon et al. 2011). Time series analyses of fish oil prices versus rapeseed oil prices (rape seed oil prices are not available[[4]](#footnote-5)) result in high correlation as detailed below, and both series display a marked positive trend (Fig. 4b). This is likely to partly explain the lack of significant relationships between the fish oil series of price and above tested series of production or fish catches. The above statements are confirmed by simple statistical analyses performed at the regional and global scales, presented below.

*Regional scale:*

Here, we use only local 1994-2012 yearly data (monthly data are not available) of Peruvian FMFO FOB prices and FOB prices of Brazilian vegetable substitutes. The linear regression between the differentiated series of fishmeal prices versus soybean meal prices is not significant (corrected r²=0.05, p>0.05), whereas the linear regression between the differentiated series of fish oil prices versus soybean oil prices is strong (r²=0.70 p<.001), with a positive sign. There is no indication of autocorrelation in the residuals ((Durbin-Watson test; p>0.05), which are normally distributed (Jarque Bera Test; p>0.05).

*Global scale:*

FAO datawere available at a monthly scale for FOB prices. Stationarity of soybean meal and rapeseed oil prices was obtained after first differentiating the three full series (1994-2010) with a one-month lag (augmented Dickey-Fuller tests; both p values <0.05). The results were similar to the regional results but weaker. The linear regression between the differentiated series of fishmeal versus soybean meal prices is not significant (corrected r²=0.002; p=0.39), which confirms the results of Kristofferson and Anderson (2006) regarding recent changes in this relationship. In contrast, the linear regressions between the differentiated series of fish oil prices versus soybean oil or rapeseed oil prices are significant (p<0.01) but with a moderate corrected r² of 0.20 and 0.17, respectively. In both cases, autocorrelation in the residuals is obtained (Durbin-Watson test; p<0.05) and the residual distributions differ from normality (Jarque Bera Test; p<0.05).

**References**

Arnason R (2007) The Economics of Rising Fuel Costs and European Fisheries. EuroChoices 6(1): 22–29

Asche F, Tveterås S (2004) On the relationship between aquaculture and reduction fisheries. Am J Agr Econ 55(2): 245–65

Asche F, Oglend A, Tveterås S (2013) Regime shifts in the fish meal/soyabean meal price ratio. J Agr Econ 64(1): 97–111

Avadi A, Fréon P (2013) Life Cycle Assessment of fisheries: a review for fisheries scientists and managers. Fish Res 143: 21– 38

Hardy RW (2010) Utilization of plant proteins in fish diets: effects of global demand and supplies of fishmeal. Aquac Res 41: 770–776

Kristoferssona D, Anderson JL (2006) Is there a relationship between fisheries and farming? Interdependence of fisheries, animal production and aquaculture. Mar Pol 30: 721–725

Paredes CE, Gutierrez M-E (2008) La industria anchovetera peruana: costos y beneficios. World Bank Rep, Washington DC

Parker RWR,Tyedmers PH (2011) Uncertainty and natural variability in the ecological footprint of fisheries: A case study of reduction fisheries for meal and oil. Ecol Indic 16: 76-83

Sieczka P, Holyst J A (2009) Correlations in commodity markets. Physica A 388: 1621–1630

Tacon AGJ, Hasan MR, Metian M (2011) Demand and supply of feed ingredients for farmed fish and crustaceans: trends and prospects. FAO Fish and AquaTech Pap 564: 87 pp

Turchini GM, Ng W-K, Tocher DR (Eds) (2011) Fish oil replacement and alternative lipid sources in aquaculture feeds. Taylor & Francis CRC Press, Boca Raton

1. Fishmeal CIF Europe; Fish oil: Any origin, CIF North West Europe. [↑](#footnote-ref-2)
2. A « semi-variable cost » is commonly defined as an expense which contains both a fixed-cost component and a variable-cost component. [↑](#footnote-ref-3)
3. The same relationship with Peruvian catch data only provided similar results : corrected r²=0.35; p>0.5) [↑](#footnote-ref-4)
4. Rapeseed oil and soybean oil are common substitutes of fish oil in animal feed, particularly in aquafeed (Tacon et al. 2011). The correlation between both the first differentiated series of annual prices on the Dutch fob ex-mill market for the period 1994-2012 is extremely high (corrected r²=.93; p<0.001) [↑](#footnote-ref-5)
